# Supplementary material for: The evolutionarily conserved TSC/Rheb pathway activates Notch in tuberous sclerosis complex and Drosophila external sensory organ development
Source: JCI journal article supplement (doi:10.1172/jci40221), 2010-01-04
Supplement: sd1 [file 1]

# Supplementary Figure 1

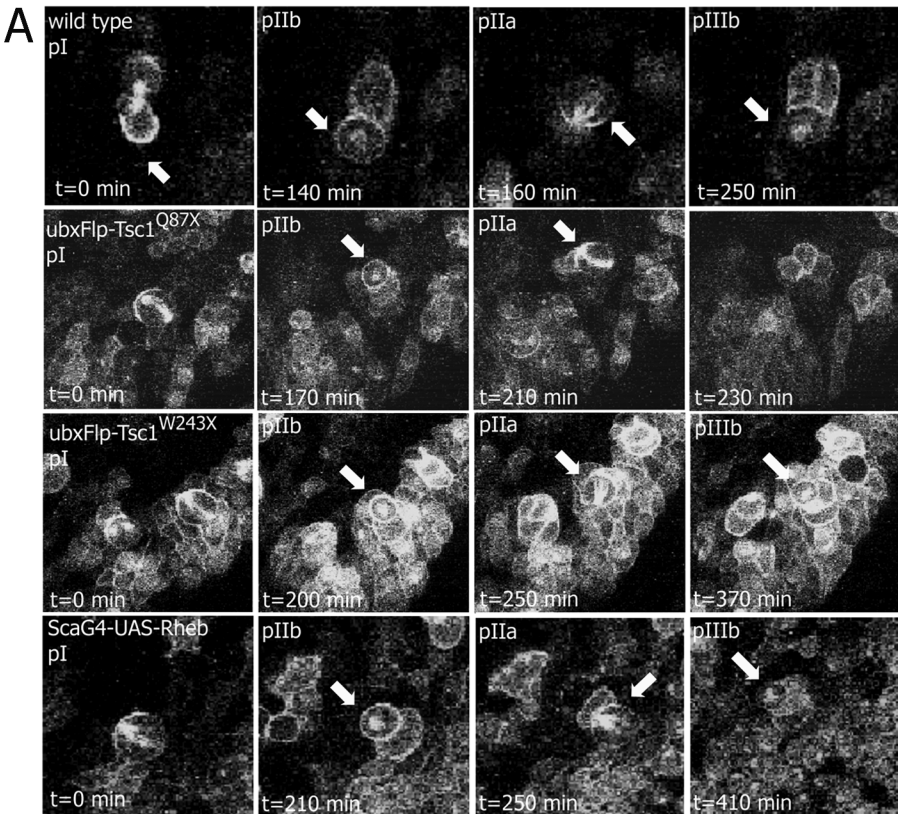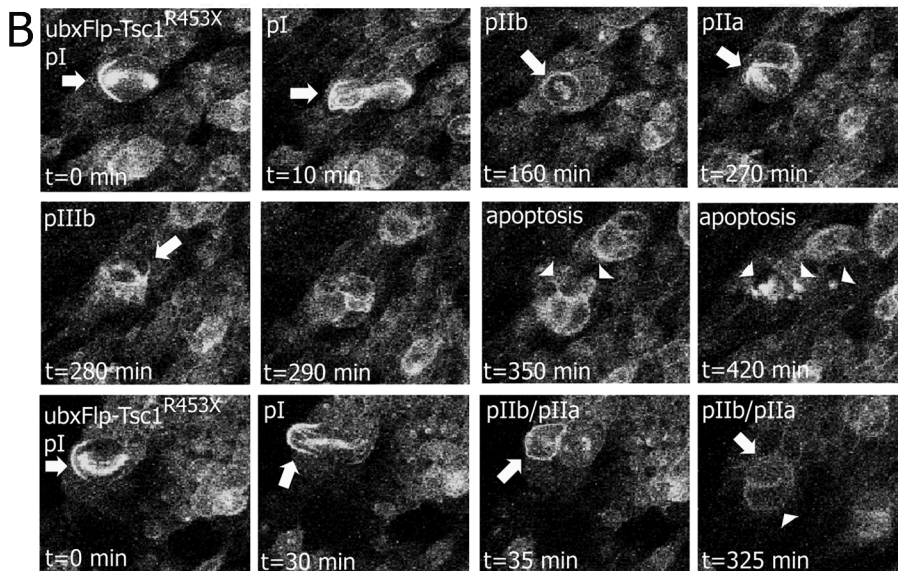

**Supplementary Figure 1. Division delays and apoptosis in Tsc1 mutant and Rheb expressing flies**

**(A)** Live imaging of wild type, Tsc1 mutant, and Rheb overexpressing SOP lineage cells expressing Pon-GFP and Tau-GFP. Division delays in the Tsc1<sup>Q87X</sup> and Tsc1<sup>W243X</sup> alleles and in Rheb transgenic overexpression. Mitotic cells are identified by Tau-GFP localization to the mitotic spindle (white arrows).

**(B)** Division delays and apoptosis as well as division arrest in the Tsc1<sup>R453X</sup> SOP lineage. Mitosis is delayed (white arrows) and cells undergo apoptosis (white arrowheads), or cells arrest after pI mitosis (bottom series). All panels in this figure are extracted from large area of cells undergoing mitosis; therefore individual images are pixilated.

**Supplemental Table 1. Adult fly phenotypes**

| Cross                 |                    | Number scored | Twinning % $\pm$ st dev | Missing % $\pm$ st dev |
|-----------------------|--------------------|---------------|-------------------------|------------------------|
| Tsc1 <sup>R453X</sup> |                    | 238           | 5.04 $\pm$ 3.4          | -                      |
| Tsc1 <sup>W243X</sup> |                    | 490           | 1.63 $\pm$ 1.9          | -                      |
| ScaGal4               | CyO                | 658           | 0 $\pm$ 0.0             | 0.6 $\pm$ 0.6          |
| ScaGal4               | UAS-dTOR           | 618           | 0 $\pm$ 0.0             | 0.65 $\pm$ 0.7         |
| ScaGal4-UAS-Rheb      | CyO                | 1400          | 0.57 $\pm$ 0.4          | 0.07 $\pm$ 0.3         |
| ScaGal4-UAS-Rheb      | CyO*               | 1914          | 1.88 $\pm$ 0.8          | 0.94 $\pm$ 0.6         |
| ScaGal4-UAS-Rheb      | ScaGal4-UAS-Rheb*  | 328           | 2.95 $\pm$ 1.2          | 7.69 $\pm$ 0.7         |
| ScaGal4-UAS-Rheb      | UAS-Lgl3A-CA       | 1320          | 9.31 $\pm$ 2.8**        | 2.27 $\pm$ 1.2         |
| ScaGal4               | UAS-Lgl3A-CA       | 1295          | 2.39 $\pm$ 1.2**        | 2.54 $\pm$ 2.0         |
| ScaGal4-UAS-Rheb      | UAS-Rab11-YFP-CA31 | 1488          | 0.53 $\pm$ 0.6          | 0.2 $\pm$ 0.5          |
| ScaGal4               | UAS-Rab11-YFP-CA31 | 504           | 0.0 $\pm$ 0.0           | 0.0 $\pm$ 0.0          |
| ScaGal4-UAS-Rheb      | UAS-EP3324 (Nuf)   | 1104          | 0.72 $\pm$ 0.5          | 0.0 $\pm$ 0.0          |
| ScaGal4               | UAS-EP3324 (Nuf)   | 1815          | 0.66 $\pm$ 0.7          | 0.22 $\pm$ 0.4         |

All crosses were done at 25°C except \*, which were done at 29°C.

\*\* ScaGal4-UAS-Rheb/UAS-Lgl3A-CA vs ScaGal4/UAS-Lgl-CA, synergistic at

p<0.001

**Supplemental Table 2. Division times**

| Strain                | pIIb<br>minutes $\pm$ st dev<br>(% of SOPs with<br>delay) | pIIa<br>minutes $\pm$ st dev<br>(% of SOPs with<br>delay) | pIIIb<br>minutes $\pm$ st dev<br>(% of SOPs with<br>delay) |
|-----------------------|-----------------------------------------------------------|-----------------------------------------------------------|------------------------------------------------------------|
| Wild type             | 139.5 $\pm$ 17.03                                         | 153.6 $\pm$ 14.6                                          | 277.72 $\pm$ 36.8                                          |
| Tsc1 <sup>Q87X</sup>  | 160 $\pm$ 10<br>(21.5)<br><i>NS</i>                       | 182.2 $\pm$ 13.01<br>(64.3)<br><i>p=0.0004</i>            | 315 $\pm$ 21.2<br>(14.3)<br>(21.4)*<br><i>p=0.0004</i>     |
| Tsc1 <sup>W243X</sup> | 195 $\pm$ 46.3<br>(75)<br><i>p=0.002</i>                  | 238.7 $\pm$ 56.1<br>(100)<br><i>p=0.00000002</i>          | 306.6 $\pm$ 46.1<br>(50)<br><i>NS</i>                      |
| Tsc1 <sup>R453X</sup> | 151.6 $\pm$ 7.6<br>(34)<br>(66)*<br><i>NS</i>             | 205 $\pm$ 55<br>(34)<br>(66)*<br><i>p=0.0007</i>          | 267 $\pm$ 3.5<br>(66)*<br><i>NS</i>                        |
| ScaGal4/UAS-Rheb      | 195 $\pm$ 39.2<br>(90.9)<br><i>p=0.000003</i>             | 234.5 $\pm$ 45.1<br>(100)<br><i>p=0.0000000002</i>        | 363.7 $\pm$ 69.2<br>(90.9)<br><i>p=0.0007</i>              |

\* (% SOPs without further division)

*NS*-not significant
